# Supplementary material
Source: Research Square preprint supplement (doi:10.21203/rs.3.rs-9108740/v1)
Supplement: Supplementary file 1 [file 73356eb21c0d460ed23f2d8f.docx]

**Support material-Coastal lowlands exposure estimations of buildings, roads, and population under lower, equal, and upper exposure estimate scenarios.**

## Exposed buildings

##### Scenario 1 – lower exposure estimate

Table 1 Coastal lowlands buildings exposed to shallow (<=1 m) and deeper (>1 m) groundwater by region (NZD$ 2025): Scenario 1 – lower exposure estimate

| Region | Buildings Exposed to shallow groundwater | Replacement Cost of buildings exposed (NZD$) | Buildings not exposed to shallow groundwater | Replacement Cost of buildings not exposed (NZD$) |
| --- | --- | --- | --- | --- |
| **Auckland Region** | **15,082** | **9,078,779,307** | **52,459** | **31,046,770,324** |
| **Bay of Plenty Region** | **7,461** | **2,013,500,222** | **41,145** | **3,892,931,758** |
| **Canterbury Region** | **40,805** | **11,951,874,795** | **63,289** | **17,276,092,801** |
| Gisborne Region | None | None | 9,974 | 4,160,992,828 |
| Hawke's Bay Region | 2,121 | 22,717,630 | 32,885 | 206,750,960 |
| Manawatū-Whanganui Region | 1,670 | 405,252,201 | 7,637 | 2,155,984,266 |
| Marlborough Region | 5,754 | 1,968,297,601 | 12,619 | 4,598,144,247 |
| Nelson Region | 32 | 906,051 | 3,776 | 211,613,765 |
| Northland Region | 1,579 | 714,965,431 | 13,599 | 5,482,043,424 |
| **Otago Region** | **2,611** | **3,011,248** | **7,713** | **442,935,811** |
| Southland Region | 21 | 38,776,113 | 16,800 | 9,528,737,567 |
| Taranaki Region | 73 | 21,067,236 | 2,781 | 1,445,468,921 |
| Tasman Region | 400 | 48,126,450 | 11,875 | 1,009,579,810 |
| **Waikato Region** | **4,480** | **39,511,075** | **30,143** | **162,189,863** |
| Wellington Region | 1,410 | 3,311,106,898 | 20,629 | 6,803,063,242 |
| West Coast Region | 49 | 14,852,001 | 11,291 | 3,489,379,415 |
| **Grand Total** | **83,548** | **29,632,744,259** | **338,615** | **91,912,679,002** |

**
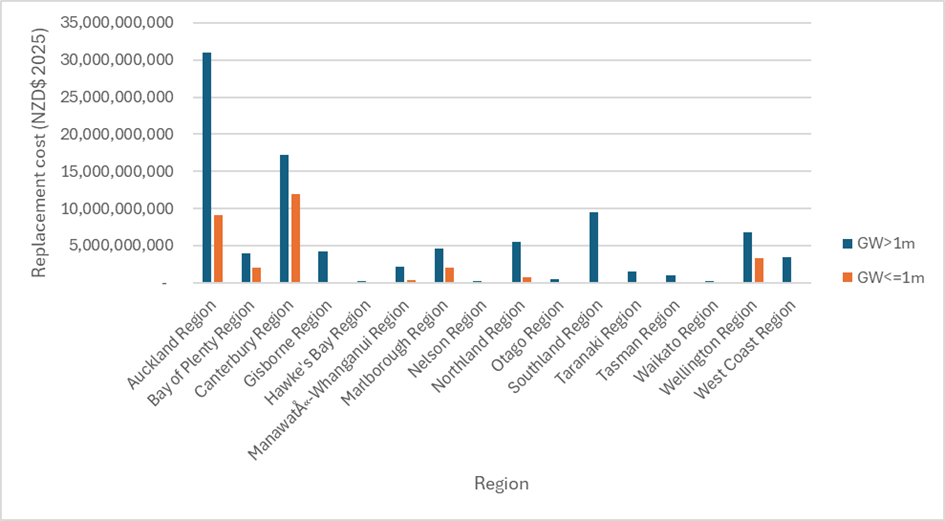
**

Fig. 1 Estimated replacement cost of exposed and unexposed buildings in the coastal lowlands by region (NZD$ 2025): Scenario 1 – lower error estimate, generated our own from this study

##### Scenario 2 – equal error estimate

Around 211,972 coastal lowlands buildings are estimated to be exposed to shallow groundwater using this equal error estimate scenario. These buildings represent an estimated replacement cost of NZD$ 71 billion. The Canterbury Region has the greatest level of building exposure, with approaching 63,528 buildings exposed, with an estimated replacement cost of NZD$ 18 billion. Auckland, Bay of Plenty, Waikato, Hawke's Bay regions follow as the top five regions exposed to shallow groundwater in New Zealand coastal lowland areas, with estimated replacement ranging from NZD$ 90 million to NZD$30 billion (Table 3‑2 &Figure 3-2). Although Auckland region has the second highest exposure, the replacement cost of exposed coastal lowland buildings is highest overall. Compared to exposed buildings, an estimated 210,191 buildings across New Zealand are not exposed to shallow groundwater under this scenario. In other words, more buildings are estimated to be exposed to groundwater compared to those that are not exposed to groundwater using this estimate (Table 3-2).

Table 3 Coastal lowlands buildings exposed to shallow (<=1 m) and deeper (>1 m) groundwater by region (NZD$ 2025): Scenario 2 – equal error estimate

| Region | Buildings Exposed to shallow groundwater | Replacement Cost of buildings exposed (NZD$) | Buildings not exposed to shallow groundwater | Replacement Cost of buildings exposed (NZD$) |
| --- | --- | --- | --- | --- |
| **Auckland Region** | **50,637** | **29,941,639,468** | **16,904** | **10,183,910,163** |
| **Bay of Plenty Region** | **23,115** | **4,668,633,286** | **25,491** | **1,237,798,694** |
| **Canterbury Region** | **63,528** | **17,636,486,567** | **40,566** | **11,591,481,029** |
| Gisborne Region | 238 | 80,834,196 | 9,736 | 4,080,158,632 |
| **Hawke's Bay Region** | **13,784** | **90,363,712** | **21,222** | **139,104,878** |
| Manawatū-Whanganui Region | 5,518 | 1,755,102,677 | 3,789 | 806,133,790 |
| Marlborough Region | 12,314 | 4,483,651,107 | 6,059 | 2,082,790,741 |
| Nelson Region | 1,426 | 106,883,594 | 2,382 | 105,636,222 |
| Northland Region | 8,074 | 3,265,771,932 | 7,104 | 2,931,236,923 |
| Otago Region | 5,045 | 19,969,192 | 5,279 | 425,977,867 |
| Southland Region | 745 | 270,761,471 | 16,076 | 9,296,752,209 |
| Taranaki Region | 881 | 474,281,070 | 1,973 | 992,255,087 |
| Tasman Region | 2,151 | 228,735,893 | 10,124 | 828,970,367 |
| **Waikato Region** | **16,682** | **150,174,362** | **17,941** | **51,526,576** |
| Wellington Region | 5,117 | 6,585,566,486 | 16,922 | 3,528,603,654 |
| West Coast Region | 2,717 | 777,763,729 | 8,623 | 2,726,467,687 |
| **Grand Total** | **211,972** | **70,536,618,742** | **210,191** | **51,008,804,519** |


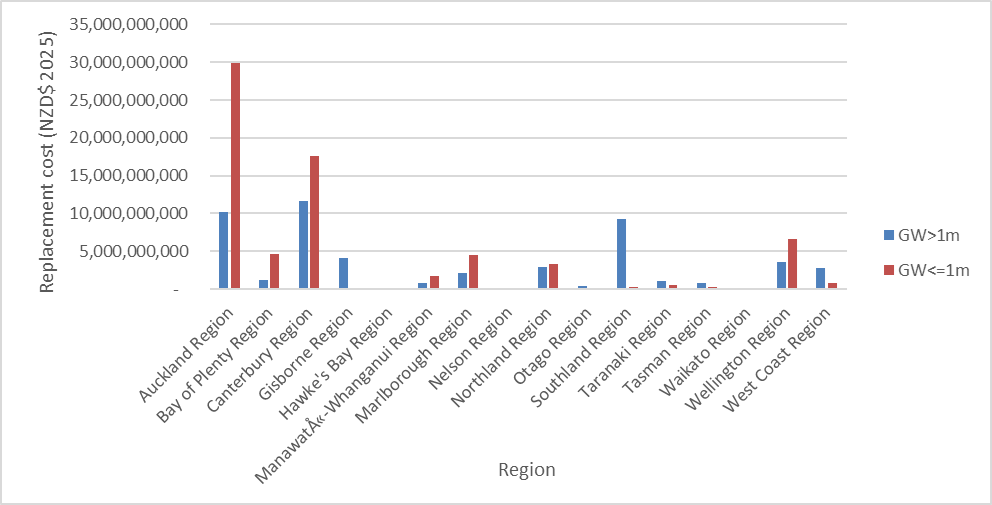


Fig. 2 Estimated replacement cost of exposed and unexposed buildings in the coastal lowlands by region (NZD$ 2025): Scenario 2 – equal error estimate, generated our own from this study

##### Scenario 3 – upper exposure estimate

Around 286,859 buildings are estimated to be exposed to shallow groundwater under an upper exposure estimate scenario. These buildings represent a combined estimated replacement cost of NZD$ 89 billion. The Canterbury Region contains the largest share of building exposure, accounting for 72,730 exposed buildings with an estimated replacement cost of NZD$ 20 billion. Auckland, Bay of Plenty, Hawke's Bay, and Waikato region follow, with an estimated replacement cost range from NZD$ 122 million to NZD$ 36 billion (Table 3‑3 & Figure 3-3). By comparison, around 135,304 buildings nationally estimated to remain unexposed to shallow groundwater. In another words, the number of exposed buildings far exceeds the number of unexposed buildings using this scenario (Table 3‑3).

Table 4 Coastal lowland buildings exposed to shallow (<=1 m) and deeper (>1 m) groundwater by region (NZD$ 2025): Scenario 3 – upper exposure estimate

| Region | Buildings exposed to shallow groundwater | Replacement Cost of buildings exposed (NZD$) | Buildings not exposed to shallow groundwater | Replacement cost of buildings not exposed (NZD$) |
| --- | --- | --- | --- | --- |
| **Auckland Region** | **61,562** | **36,861,957,478** | **5,979** | **3,263,592,153** |
| **Bay of Plenty Region** | **32,879** | **5,388,906,105** | **15,727** | **517,525,875** |
| **Canterbury Region** | **72,730** | **20,305,754,068** | **31,364** | **8,922,213,528** |
| Gisborne Region | 925 | 458,550,547 | 9,049 | 3,702,442,281 |
| **Hawke's Bay Region** | **24,047** | **122,067,618** | **10,959** | **107,400,972** |
| Manawatū-Whanganui Region | 7,975 | 2,290,859,698 | 1,332 | 270,376,769 |
| Marlborough Region | 15,603 | 5,619,074,663 | 2,770 | 947,367,185 |
| Nelson Region | 2,647 | 182,147,678 | 1,161 | 30,372,138 |
| Northland Region | 11,727 | 4,637,689,878 | 3,451 | 1,559,318,977 |
| Otago Region | 7,985 | 58,160,778 | 2,339 | 387,786,281 |
| Southland Region | 4,218 | 1,909,823,693 | 12,603 | 7,657,689,987 |
| Taranaki Region | 2,106 | 1,046,759,836 | 748 | 419,776,321 |
| Tasman Region | 3,845 | 383,657,449 | 8,430 | 674,048,811 |
| **Waikato Region** | **23,989** | **177,346,213** | **10,634** | **24,354,725** |
| Wellington Region | 8,857 | 7,514,545,573 | 13,182 | 2,599,624,567 |
| West Coast Region | 5,764 | 1,768,782,613 | 5,576 | 1,735,448,803 |
| **Grand Total** | **286,859** | **88,726,083,888** | **135,304** | **32,819,339,373** |


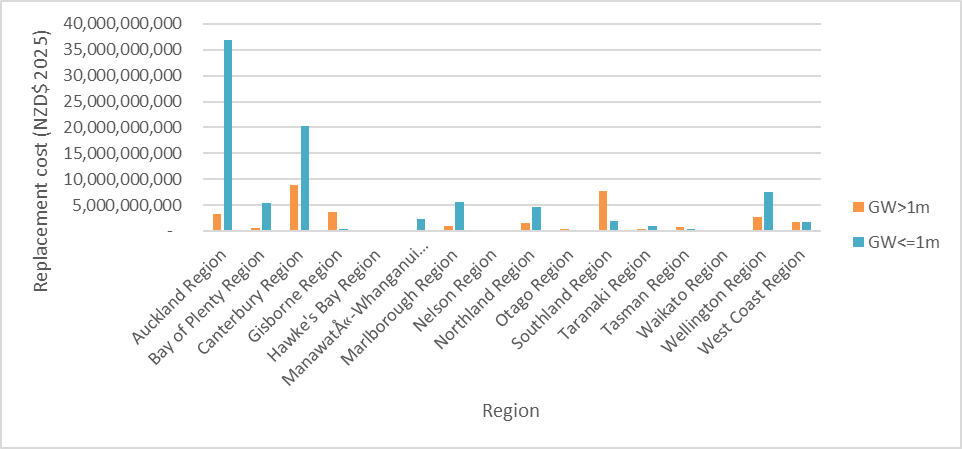


Fig. 3 Estimated replacement cost of exposed and unexposed buildings in the coastal lowlands by region (NZD$ 2025): Scenario 3 – upper exposure estimate, generated our own from this study

## Road

### Scenario 1 – lower exposure estimate

Approximately 13 per cent of New Zealand’s exposed roads are located in the coastal lowlands. 1,368 kilometres of road are estimated to be exposed to in areas of shallow groundwater with an estimated construction cost of NZD$ 1.4 billion (Table 3-8). The Canterbury Region contains the largest level of exposure, with 567 kilometres of exposed roading, at a total construction value of NZD$ 287 million (based on an average unit cost of NZD$ 506/metre) (Ministry of Transport New Zealand. 2023) (Figure 3-5&6). The following other top four exposed regions are Bay of Plenty, Auckland, Waikato, and Marlborough regions with a range of exposure varying from 83-204 kilometres, and a potential replacement cost of NZD$ 49-556 million (Table 3-8, Figure 3-5&6). Compared to exposed roading, over 51,000 kilometres of roading nationally is estimated to be unexposed and 6,430 kilometres of roading in the coastal lowland is estimated to be unexposed (Table 3-8).

Table 8 Coastal lowland roading exposed to shallow (<1 m) and deeper (>1 m) groundwater by region (NZD$ 2025): Scenario 1 – lower exposure estimates

| Region | Kilometres of road exposed to shallow groundwater | Kilometres of road not exposed | Average unit value (NZD/m) | Total cost of road exposed (NZD$) | Total cost of road not exposed (NZD$) |
| --- | --- | --- | --- | --- | --- |
| **Auckland Region** | **200** | **679** | **2,778** | **555,936,167** | **1,886,043,314** |
| **Bay of Plenty Region** | **204** | **556** | **1,231** | **251,255,590** | **683,676,123** |
| **Canterbury Region** | **567** | **1,157** | **506** | **287,272,799** | **585,863,326** |
| Gisborne Region |  | 188 | 1,075 |  | 201,610,470 |
| Hawke's Bay Region | 28 | 540 | 1,072 | 29,796,058 | 578,343,621 |
| Manawatū-Whanganui Region | 30 | 197 | 684 | 20,485,962 | 134,407,066 |
| **Marlborough Region** | **83** | **250** | **594** | **49,449,237** | **148,823,184** |
| Nelson Region | 1 | 66 | 1,648 | 2,059,862 | 109,172,677 |
| Northland Region | 50 | 428 | 599 | 29,960,505 | 256,295,508 |
| Otago Region | 30 | 343 | 573 | 17,270,599 | 196,564,047 |
| Southland Region | 2 | 500 | 489 | 954,149 | 244,751,486 |
| Taranaki Region | 1 | 56 | 784 | 1,137,298 | 43,687,922 |
| Tasman Region | 10 | 193 | 516 | 5,058,822 | 99,860,116 |
| **Waikato Region** | **136** | **590** | **968** | **131,759,913** | **571,330,734** |
| Wellington Region | 25 | 337 | 2,132 | 52,239,713 | 719,095,646 |
| West Coast Region | 0 | 350 | 486 | 194,527 | 170,284,410 |
| **Grand Total** | **1,368** | **6,430** |  | **1,434,831,202** | **6,629,809,650** |


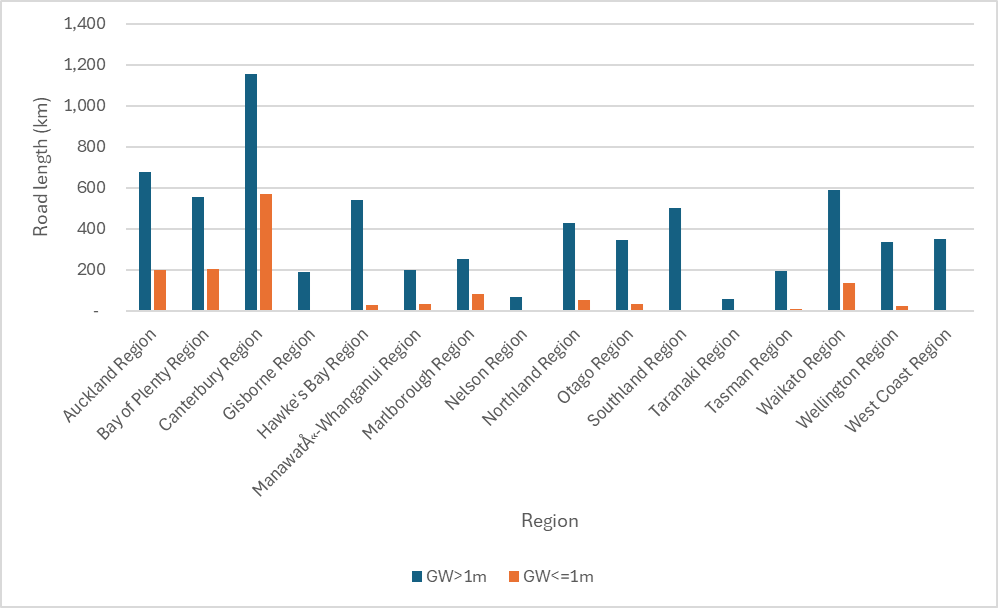


Fig. 4 Coastal lowlands exposed road length by region (unit:km): Scenario 1 – lower exposure estimate, generated our own from this study


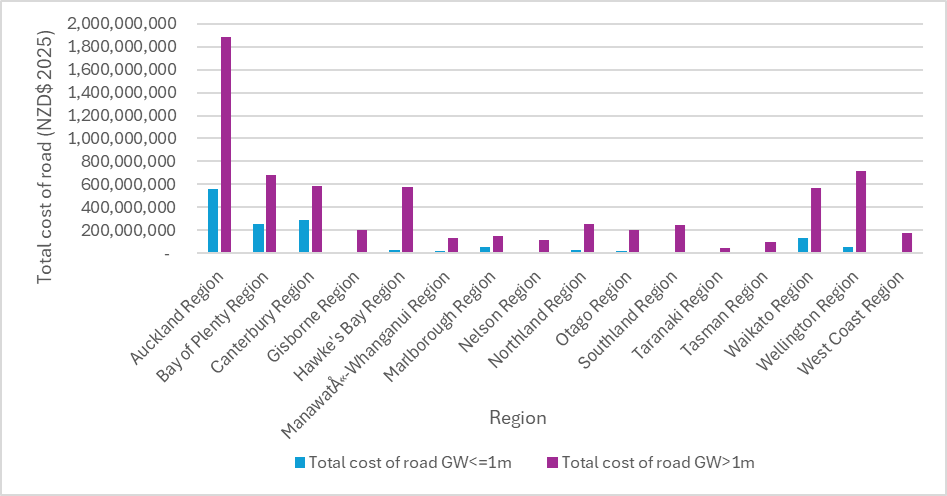


Fig. 5 Coastal lowlands exposed road replacement cost GW by region (NZD$ 2025): Scenario 1 – lower exposure estimates, generated our own from this study

### Scenario 2 – equal error estimate

Around 3,832 kilometres of coastal lowlands road are estimated to be exposed under an equal error estimate, with an estimated replacement construction cost of NZD$ 4.5 billion (Table 3-9). The Canterbury Region contains the largest share of this exposure, with over 900 kilometres of road exposed, at a total replacement construction value of NZD$ 504 million (based on an average unit cost of NZD$ 506/metre) (Ministry of Transport New Zealand. 2023). Auckland, Waikato, Bay of Plenty, and Northland Regions represent the other top five largest shares of exposed roading, with roading ranging from 267-676 kilometres exposed at an estimated replacement value of NZD$159 million to NZD$ 1.8 billion (Figure 3-6&7). Around 3,966 kilometres of national roading are estimated to be un-exposed to shallow groundwater with an estimated replacement construction cost of NZD$ 3.6 billion (Table 3-9).

Table 9 Coastal lowland roading exposed to shallow (<=1 m) and deeper (>1 m) groundwater by region (NZD$ 2025): Scenario 2 – equal error estimate

| Region | Kilometres of road exposed to shallow groundwater | Kilometres of road not exposed | Average unit value (NZD/m) | Total cost of road exposed (NZD$) | Total cost of road not exposed (NZD$) |
| --- | --- | --- | --- | --- | --- |
| **Auckland Region** | **676** | **203** | **2,778** | **1,877,569,524** | **564,409,957** |
| **Bay of Plenty Region** | **437** | **323** | **1,231** | **537,341,125** | **397,590,588** |
| **Canterbury Region** | **996** | **729** | **506** | **504,107,300** | **369,028,825** |
| Gisborne Region | 4 | 184 | 1,075 | 4,352,465 | 197,258,005 |
| Hawke's Bay Region | 210 | 357 | 1,072 | 225,024,543 | 383,115,136 |
| Manawatū-Whanganui Region | 155 | 71 | 684 | 106,260,242 | 48,632,786 |
| Marlborough Region | 177 | 157 | 594 | 105,168,780 | 93,103,642 |
| Nelson Region | 23 | 45 | 1,648 | 37,819,063 | 73,413,476 |
| **Northland Region** | **267** | **211** | **599** | **159,679,614** | **126,576,399** |
| Otago Region | 128 | 246 | 573 | 73,149,436 | 140,685,211 |
| Southland Region | 29 | 473 | 489 | 14,140,980 | 231,564,656 |
| Taranaki Region | 15 | 43 | 784 | 11,372,978 | 33,452,242 |
| Tasman Region | 42 | 161 | 516 | 21,603,235 | 83,315,703 |
| **Waikato Region** | **484** | **242** | **968** | **468,517,341** | **234,573,306** |
| Wellington Region | 146 | 216 | 2,132 | 311,199,435 | 460,135,924 |
| West Coast Region | 45 | 306 | 486 | 21,884,331 | 148,594,606 |
| **Grand Total** | **3,832** | **3,966** |  | **4,479,190,392** | **3,585,450,460** |


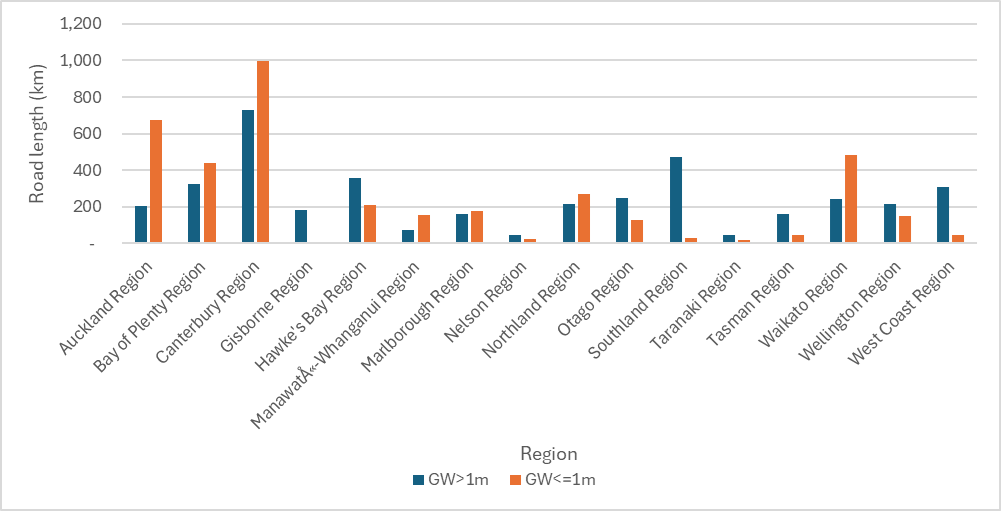


Fig. 6 Coastal lowland roads exposed to GW by region: Scenario 2 – equal error estimate at coastal lowlands, generated our own from this study


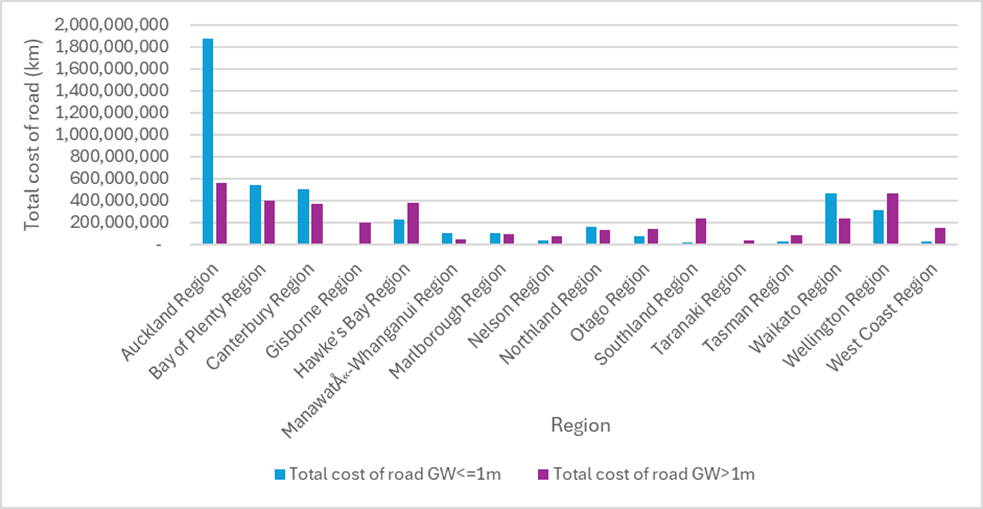


Fig. 7 Coastal lowlands exposed road replacement cost GW by region (NZD$ 2025): Scenario 2 – equal error estimate, generated our own from this study

### Scenario 3 – upper exposure estimate

5,271 kilometres of coastal lowlands roads are estimated to be exposed to shallow groundwater using an upper exposure estimate scenario with an estimated construction value of NZD$ 6 billion (Table 3-10). The Canterbury Region contains the largest share of roading, with over 1,000 kilometres of road exposed, representing a total replacement construction value of NZD$ 600 million (based on an average unit cost of NZD$ 506/metre) (Ministry of Transport New Zealand. 2023) (Table 3-10). The Auckland, Waikato, Bay of Plenty, and Northland regions contain the next top four most exposed roading level, containing a range of 385-813 kilometres of road exposed at an estimated construction value range of NZD$230 million to NZD$ 2 billion (Figure 3-8&9). Overall, more roading in the coastal lowlands remains unexposed using this estimate (around 2,500 kilometres) (Table 3-10).

Table 10 Coastal lowland roading exposed to shallow (<=1 m) and deeper (>1 m) groundwater by region (NZD$ 2025): Scenario 3 – upper exposure estimates

| Region | Kilometres of road exposed to shallow groundwater | Kilometres of road not exposed | Average unit value (NZD/m) | Total cost of road exposed | Total cost of road not exposed |
| --- | --- | --- | --- | --- | --- |
| **Auckland Region** | **813** | **66** | **2,778** | **2,258,751,144** | **183,228,337** |
| **Bay of Plenty Region** | **563** | **196** | **1,231** | **693,460,506** | **241,471,207** |
| **Canterbury Region** | **1,188** | **537** | **506** | **601,460,016** | **271,676,109** |
| Gisborne Region | 30 | 158 | 1,075 | 32,079,278 | 169,531,192 |
| Hawke's Bay Region | 363 | 204 | 1,072 | 389,010,039 | 219,129,639 |
| Manawatū-Whanganui Region | 204 | 22 | 684 | 139,810,708 | 15,082,320 |
| Marlborough Region | 261 | 73 | 594 | 155,093,490 | 43,178,931 |
| Nelson Region | 49 | 19 | 1,648 | 80,417,006 | 30,815,533 |
| **Northland Region** | **384** | **94** | **599** | **229,866,811** | **56,389,202** |
| Otago Region | 253 | 120 | 573 | 144,952,738 | 68,881,908 |
| Southland Region | 99 | 403 | 489 | 48,539,279 | 197,166,356 |
| Taranaki Region | 45 | 12 | 784 | 35,413,100 | 9,412,120 |
| Tasman Region | 81 | 122 | 516 | 41,786,903 | 63,132,035 |
| **Waikato Region** | **620** | **106** | **968** | **600,035,226** | **103,055,421** |
| Wellington Region | 210 | 152 | 2,132 | 447,982,195 | 323,353,164 |
| West Coast Region | 108 | 243 | 486 | 52,546,710 | 117,932,227 |
| **Grand Total** | **5,271** | **2,527** |  | **5,951,205,151** | **2,113,435,701** |


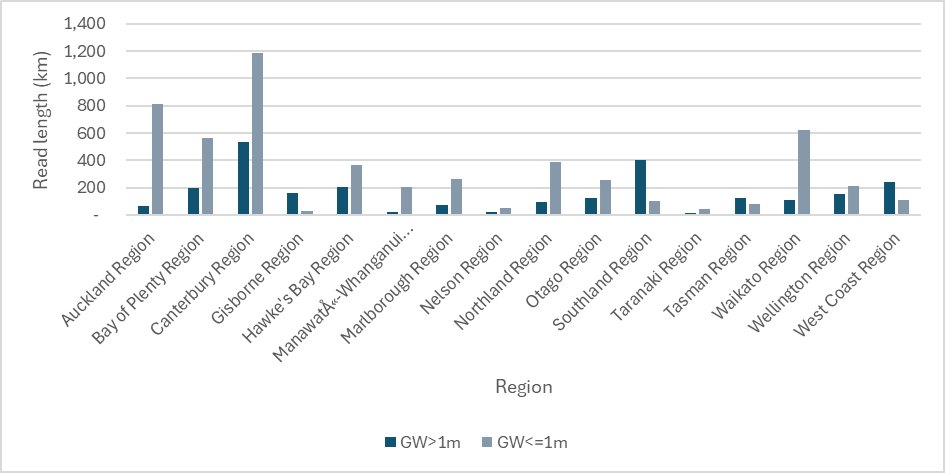


Fig. 8 Coastal lowland roads exposed to shallow groundwater by region: Scenario 3 – upper exposure estimates, generated our own from this study


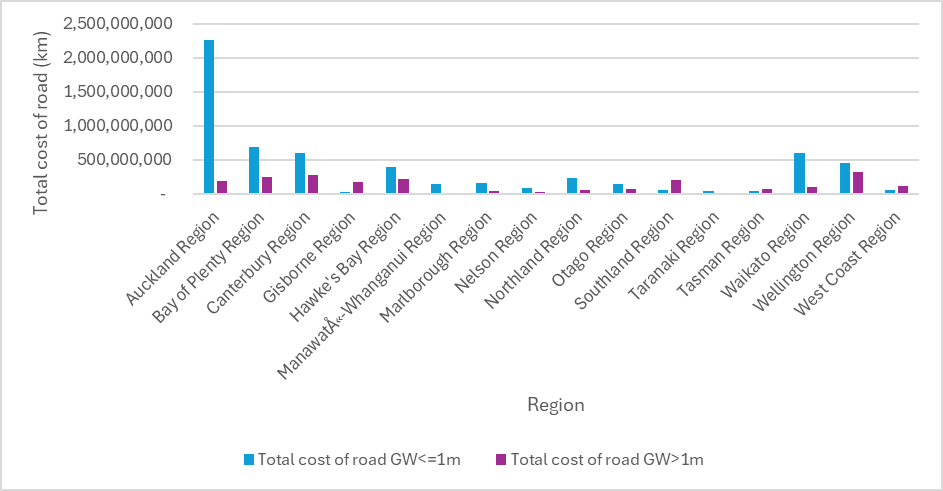


Fig. 9 Coastal lowlands exposed road replacement cost GW by region (NZD$ 2025): Scenario 3 – upper exposure estimates at coastal lowlands, generated our own from this study

## Population

### Scenario 1 – lower exposure estimate

Approximately 17 per cent of people nationally exposed to shallow groundwater are located in New Zealand’s coastal lowlands. Around 190,000 people are estimated to be exposed to under this low exposure estimate scenario (Table 3-12). The top five exposed regions are Canterbury, Auckland, Bay of Plenty, Wellington, and Otago Regions with population exposed ranging 6,000-73,000 (Table 3-12 & Figure3-10).

Table 12 Coastal lowlands population exposed to shallow (<=1 m) and deeper (>1 m) groundwater by region (2022 figures): Scenario 1 – lower exposure estimate

| Region | Population exposed to shallow groundwater | Population not exposed | Lower exposure estimate total |
| --- | --- | --- | --- |

| **Auckland Region** | **63,826** | **208,786** | **272,612** |
| --- | --- | --- | --- |
| **Bay of Plenty Region** | **15,329** | **91,776** | **107,105** |
| **Canterbury Region** | **73,030** | **116,018** | **189,048** |
| Gisborne Region |  | 15,748 | 15,748 |
| Hawke's Bay Region | 3,637 | 64,425 | 68,063 |
| Manawatū-Whanganui Region | 1,914 | 9,162 | 11,076 |
| Marlborough Region | 7,139 | 18,911 | 26,050 |
| Nelson Region | 169 | 10,482 | 10,651 |
| Northland Region | 2,606 | 24,904 | 27,510 |
| **Otago Region** | **6,425** | **14,263** | **20,687** |
| Southland Region | 16 | 31,865 | 31,881 |
| Taranaki Region | 420 | 7,004 | 7,425 |
| Tasman Region | 546 | 15,909 | 16,455 |
| Waikato Region | 4,145 | 28,077 | 32,222 |
| **Wellington Region** | **8,721** | **47,618** | **56,339** |
| West Coast Region | 32 | 12,242 | 12,273 |
| **Grand Total** | **187,955** | **717,190** | **905,145** |


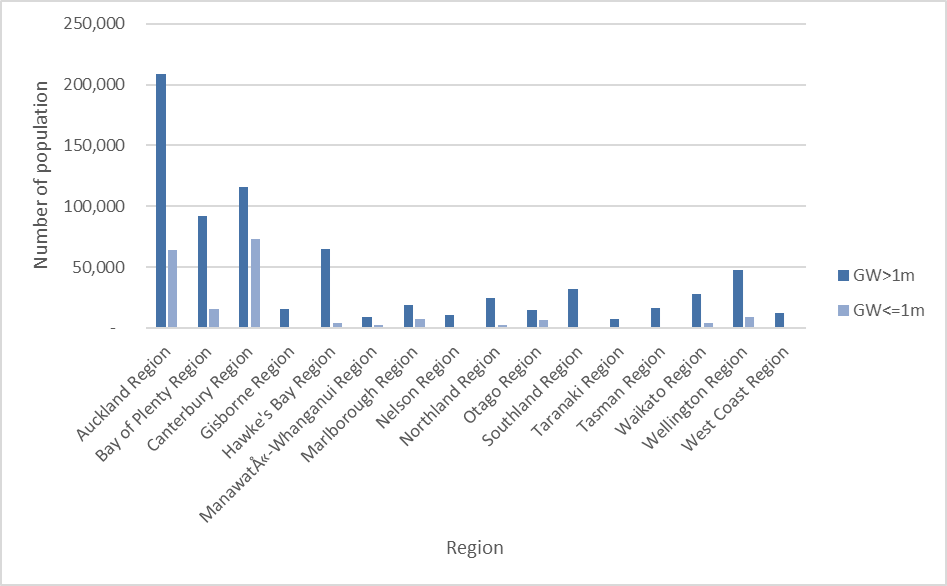


Fig. 10 Coastal lowlands population exposed to GW by region: Scenario 1 – lower error estimate, generated our own from this study

##### Scenario 2 – equal error estimate

504,000 people cross New Zealand’s coastal lowlands are estimated to be exposed to shallow groundwater less than 1 metre from the gound surface when using an equal error scenario estimate. The top five most exposed regions are Auckland, Canterbury, Bay of Plenty, Hawke's Bay, and Wellington Regions with a range of population exposed ranging from 21,000-204,000 (Table 3-13 & Figure 3-11).Under this scenario, more people across New Zealand’s coastal lowlands are exposed (504,000) to shallow groundwater than not (400,000) (Table 3-13).

Table 13 Coastal lowlands population exposed to shallow (<=1 m) and deeper (>1 m) groundwater by region (2022 figures): Scenario 2 – equal error estimate

| Region | Population exposed to shallow groundwater | Population not exposed to shallow groundwater | Equal error estimate total |
| --- | --- | --- | --- |
| **Auckland Region** | **204,730** | **67,882** | **272,612** |
| **Bay of Plenty Region** | **50,118** | **56,987** | **107,105** |
| **Canterbury Region** | **116,661** | **72,386** | **189,048** |
| Gisborne Region | 536 | 15,213 | 15,748 |
| **Hawke's Bay Region** | **26,553** | **41,510** | **68,063** |
| Manawatū-Whanganui Region | 6,883 | 4,192 | 11,076 |
| Marlborough Region | 16,127 | 9,923 | 26,050 |
| Nelson Region | 4,406 | 6,244 | 10,651 |
| Northland Region | 15,918 | 11,592 | 27,510 |
| Otago Region | 12,519 | 8,169 | 20,687 |
| Southland Region | 1,457 | 30,423 | 31,881 |
| Taranaki Region | 2,263 | 5,162 | 7,425 |
| Tasman Region | 3,544 | 12,911 | 16,455 |
| Waikato Region | 17,844 | 14,378 | 32,222 |
| **Wellington Region** | **21,222** | **35,117** | **56,339** |
| West Coast Region | 3,758 | 8,515 | 12,273 |
| **Grand Total** | **504,539** | **400,606** | **905,145** |


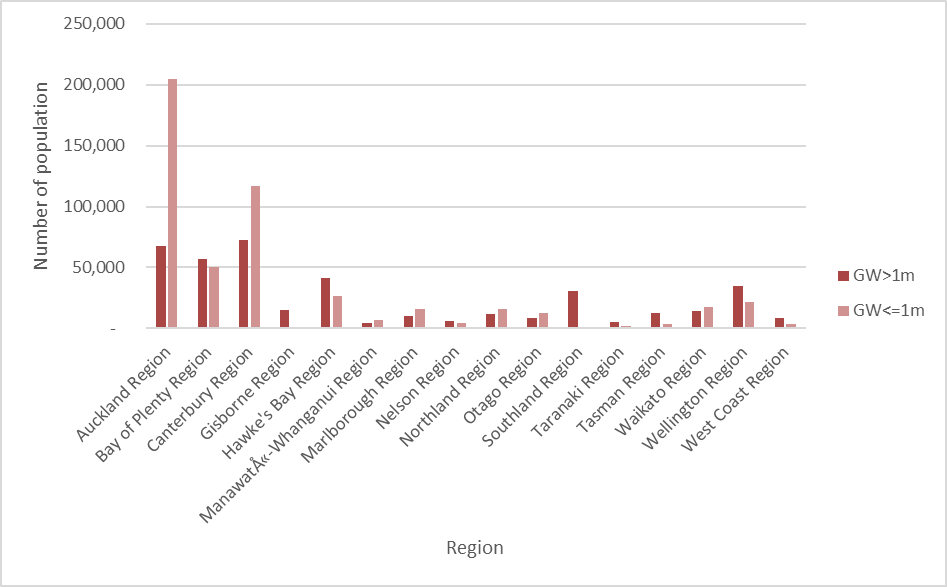


Fig. 11 Coastal lowlands population exposed to GW by region: Scenario 2 – equal error estimate, generated our own from this study

##### Scenario 3 – upper exposure estimate

668,000 people across New Zealand’s coastal lowlands are estimated to be exposed to shallow groundwater when an upper exposure estimate is used (Table 3-4). The top five regions most exposed are Auckland, Canterbury, Bay of Plenty, Hawke's Bay, and Wellington Regions with a range of population exposed ranging from 30,000-250,000 (Table 3-11 & Figure 3-12).Using this estimate scenario, three times as many people across New Zealand are exposed to shallow groundwater than not (236,000) (Table 3-14).

Table 14 Coastal lowlands population exposed to shallow (<1 m) and deeper (>1 m) groundwater by region (2022 figures): Scenario 3 – upper exposure estimate

| Region | Population exposed to shallow groundwater | Population not exposed to shallow groundwater | Upper exposure estimate total |
| --- | --- | --- | --- |

| **Auckland Region** | **250,256** | **22,355** | **272,612** |
| --- | --- | --- | --- |
| **Bay of Plenty Region** | **71,726** | **35,379** | **107,105** |
| **Canterbury Region** | **135,855** | **53,193** | **189,048** |
| Gisborne Region | 1,316 | 14,433 | 15,748 |
| **Hawke's Bay Region** | **47,918** | **20,145** | **68,063** |
| Manawatū-Whanganui Region | 10,369 | 707 | 11,076 |
| Marlborough Region | 21,635 | 4,415 | 26,050 |
| Nelson Region | 7,839 | 2,812 | 10,651 |
| Northland Region | 22,036 | 5,474 | 27,510 |
| Otago Region | 16,826 | 3,861 | 20,687 |
| Southland Region | 8,518 | 23,363 | 31,881 |
| Taranaki Region | 5,213 | 2,211 | 7,425 |
| Tasman Region | 6,094 | 10,361 | 16,455 |
| Waikato Region | 25,741 | 6,481 | 32,222 |
| **Wellington Region** | **30,239** | **26,100** | **56,339** |
| West Coast Region | 6,974 | 5,299 | 12,273 |
| **Grand Total** | **668,554** | **236,591** | **905,145** |


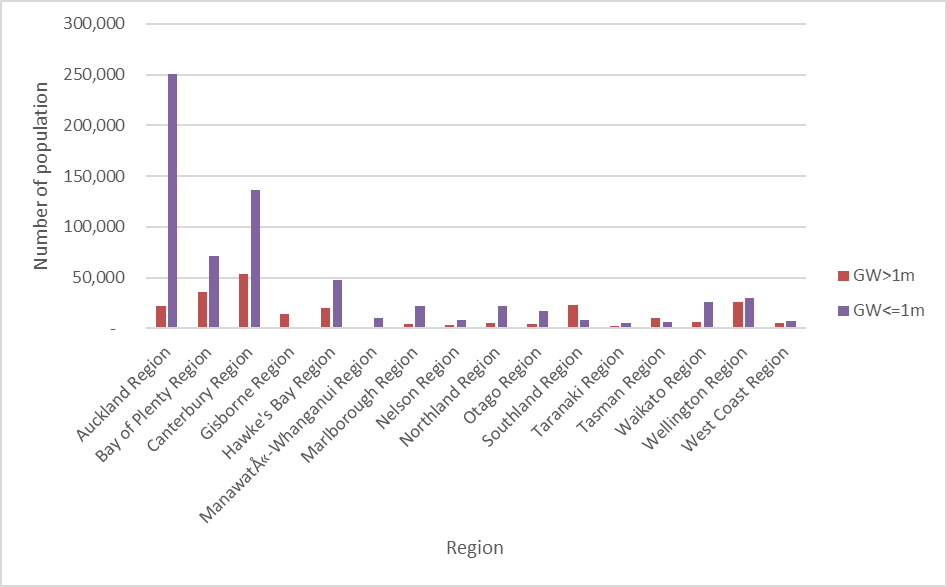


Fig. 12 Coastal lowlands population exposed to GW by region: Scenario 3 – upper exposure estimate, generated our own from this study
